# Supplementary material
Source: publisher figshare collection journal article supplement (https://springernature.figshare.com/ndownloader/files/16379588)
Supplement: Supplementary file 1 [file 16379588]

## Sheet: Volcanic_vents
Number	UTM WGS84 18S	UTM WGS84 18S	Age BP
	Easting	Northing
1	737517	5526850	500
2	739127	5526346	225
3	739501	5527050	3700
4	740288	5524009	1700
5	740660	5523928	150
6	740778	5523532	2850
7	741062	5523263	2550
8	741149	5523610	200
9	741610	5524058	800
10	741322	5524455	900
11	742058	5524377	1100
12	742195	5524524	1600
13	742208	5524749	1200
14	742128	5525357	3500
15	742634	5525210	1500
16	742870	5524965	2000
17	742608	5525856	3200
18	741360	5527313	4800
19	742320	5526963	8250
20	742660	5526765	8450
21	742828	5526412	8650
22	743700	5526343	6750
23	742015	5528970	7500
24	743877	5528091	12400
25	744261	5523985	750
26	744967	5525181	400
27	745537	5525793	700
28	745459	5526320	1750
29	746129	5526406	5250
30	746149	5526590	9950
31	745425	5527751	6500
32	745718	5528426	5000
33	746341	5529346	2300
34	746737	5528873	13000
35	746266	5523006	16000
36	748561	5527605	60
37	746704	5524221	3400
38	748783	5527181	3000
39	746545	5525826	5750
40	746896	5527498	7000
41	747601	5526273	100
42	749163	5530490	12500
43	749065	5530124	10000
44	749475	5530344	11000
45	749234	5528034	4600
46	749408	5527685	4500
47	749571	5527776	4200
48	749705	5527991	40
49	749997	5528292	2500
50	750425	5528419	1300
51	750620	5528974	6250
52	750831	5527716	4000
53	751588	5528307	1400
54	752049	5528718	8150
55	751920	5529060	6000
56	752631	5528902	9500
57	752700	5529281	15000
58	753290	5529079	14000
59	753813	5529186	17000
60	753995	5529965	9000
61	751920	5530731	8000
62	752876	5524282	600
63	753233	5523892	12000
64	753646	5523494	12250

## Sheet: Thermal_anomalies
Number	UTM WGS84 18S	UTM WGS84 18S
	Easting	Northing
1	749804	5.52806e+06
2	745821	5.5315e+06
3	744654	5.52965e+06
4	753356	5.52992e+06
5	751478	5.52726e+06
6	754675	5.52957e+06
7	752714	5.52935e+06
8	752935	5.53066e+06
9	755030	5.53148e+06
10	755465	5.52593e+06
11	748151	5.52561e+06
12	747129	5.52595e+06
13	747511	5.52657e+06
14	747327	5.52691e+06
15	747779	5.52673e+06
16	748020	5.52671e+06
17	747839	5.52717e+06
18	747893	5.52738e+06
19	745918	5.52875e+06
20	744229	5.52829e+06
21	744364	5.52794e+06
22	744405	5.53068e+06
23	744309	5.53102e+06
24	745795	5.53045e+06
25	746388	5.5308e+06
26	752092	5.53373e+06
27	756839	5.53295e+06
28	757259	5.5325e+06
29	757522	5.53285e+06
30	754176	5.52303e+06
31	753008	5.52263e+06
32	750694	5.52292e+06
33	747630	5.52348e+06
34	746555	5.52249e+06
35	744663	5.52392e+06
36	744295	5.52397e+06
37	740918	5.52383e+06
38	739375	5.52638e+06
39	742785	5.52681e+06
40	743121	5.52664e+06
41	742788	5.52734e+06
42	742665	5.52773e+06
43	739742	5.53031e+06
44	742178	5.53252e+06
45	742241	5.53221e+06
46	742714	5.5321e+06
47	742685	5.53169e+06
48	742515	5.53089e+06
49	744833	5.53207e+06
50	758534	5.5359e+06
51	753621	5.54047e+06
52	756954	5.53269e+06

## Sheet: Earthquake_epicenters
Number	UTM WGS84 18S	UTM WGS84 18S
	Easting	Northing
1	740067	5530957
2	744967	5532773
3	746186	5538923
4	748107	5531478
5	749538	5530650
6	749974	5529504
7	751901	5524175
8	752085	5524985
9	754812	5524028
10	753331	5526135
11	753801	5525781
12	753533	5527821
13	754521	5528812
14	754980	5529221
15	752767	5530908
16	753065	5531120
17	753147	5530549
18	753307	5530966
19	753522	5530568
20	754070	5531549
21	752762	5531957
22	751177	5534147
23	753874	5533779
24	753599	5534353
25	753939	5534467
26	752391	5537809
27	750305	5537019

## Sheet: Structures
Number	UTM WGS84 18S	UTM WGS84 18S	UTM WGS84 18S	UTM WGS84 18S
	Easting_start	Northing_start	Easting_end	Northing_end
1	748696	5.526e+06	747397	5.52e+06
2	747716	5.52594e+06	746448	5.52009e+06
3	754645	5.54204e+06	752645	5.53102e+06
4	757419	5.54196e+06	755938	5.52264e+06
5	750377	5.52646e+06	749914	5.52326e+06
6	752338	5.52715e+06	750726	5.52154e+06
7	736328	5.53013e+06	735670	5.52655e+06
8	749382	5.52205e+06	749843	5.52073e+06
9	735631	5.52549e+06	735585	5.52406e+06
10	736918	5.52616e+06	736540	5.52529e+06
11	737173	5.52611e+06	736750	5.52483e+06
12	738202	5.52627e+06	738005	5.5254e+06
13	738600	5.52692e+06	738304	5.526e+06
14	738709	5.52561e+06	738641	5.52474e+06
15	738046	5.52511e+06	737989	5.52428e+06
16	737555	5.52487e+06	737503	5.52411e+06
17	735251	5.5293e+06	735245	5.52881e+06
18	735011	5.52899e+06	735050	5.52849e+06
19	734016	5.52947e+06	734112	5.52825e+06
20	734084	5.53046e+06	733702	5.52855e+06
21	758769	5.53656e+06	758508	5.53365e+06
22	752382	5.52389e+06	752010	5.51989e+06
23	738926	5.5262e+06	734529	5.52361e+06
24	757660	5.53929e+06	754758	5.53779e+06
25	757858	5.53815e+06	755960	5.53675e+06
26	759270	5.53612e+06	758852	5.5356e+06
27	750881	5.52632e+06	751267	5.52638e+06
28	750784	5.52645e+06	751137	5.52664e+06
29	749328	5.52594e+06	749833	5.52588e+06
30	749330	5.52566e+06	749834	5.52558e+06
31	741178	5.53712e+06	743944	5.53786e+06
32	743368	5.53907e+06	742830	5.53802e+06
33	743803	5.53955e+06	742052	5.53719e+06
34	743075	5.53631e+06	741352	5.53562e+06
35	743506	5.53579e+06	742995	5.53576e+06
36	743782	5.53548e+06	743120	5.53542e+06
37	744032	5.5351e+06	743068	5.53527e+06
38	744074	5.53478e+06	743145	5.53484e+06
39	744462	5.53424e+06	743061	5.53391e+06
40	745057	5.53395e+06	744184	5.53358e+06
41	745924	5.53359e+06	744832	5.53346e+06
42	744966	5.53323e+06	744633	5.5327e+06
43	745568	5.53304e+06	745089	5.53255e+06
44	747339	5.53195e+06	746801	5.53184e+06
45	749130	5.53083e+06	746735	5.53055e+06
46	742381	5.54245e+06	741208	5.54079e+06
47	742295	5.54243e+06	738527	5.54003e+06
48	735526	5.53027e+06	734560	5.52849e+06
49	735812	5.52847e+06	735237	5.52813e+06
50	736791	5.52946e+06	737370	5.52955e+06
51	736464	5.52902e+06	737489	5.52912e+06
52	736303	5.5282e+06	737771	5.52859e+06
53	743065	5.52908e+06	743768	5.52943e+06
54	743062	5.52872e+06	743979	5.5291e+06
55	743049	5.52853e+06	743964	5.52889e+06
56	745238	5.52921e+06	745754	5.52932e+06
57	745543	5.52902e+06	745940	5.52924e+06
58	743687	5.52761e+06	744458	5.52773e+06
59	742945	5.52669e+06	744763	5.52784e+06
60	750410	5.52572e+06	751412	5.5258e+06
61	734594	5.53075e+06	733454	5.53017e+06
62	733757	5.52918e+06	732673	5.52786e+06
63	755813	5.52895e+06	757143	5.52793e+06
64	755764	5.52824e+06	756889	5.52731e+06
65	750744	5.52648e+06	751227	5.52579e+06
66	747700	5.52166e+06	749241	5.51998e+06
67	748853	5.52052e+06	750576	5.51995e+06
68	745596	5.52316e+06	747007	5.52206e+06
69	755935	5.52358e+06	758618	5.52153e+06
70	742871	5.53707e+06	747103	5.53315e+06
71	743824	5.53766e+06	745987	5.53734e+06
72	746023	5.53297e+06	742318	5.53389e+06
73	745967	5.53236e+06	743757	5.53262e+06
74	749187	5.52552e+06	749933	5.52494e+06
75	750082	5.52495e+06	750759	5.52461e+06
76	756509	5.53421e+06	759169	5.53339e+06
77	748542	5.52281e+06	749975	5.52203e+06
78	741746	5.52777e+06	742192	5.52653e+06
79	742614	5.52618e+06	743190	5.52529e+06
80	746746	5.53222e+06	749014	5.53085e+06
81	754258	5.52263e+06	755612	5.51976e+06
82	755995	5.52228e+06	757858	5.51971e+06

## Sheet: Eruptive_fissures
Number	UTM WGS84 18S	UTM WGS84 18S	UTM WGS84 18S	UTM WGS84 18S
	Easting_start	Northing_start	Easting_end	Northing_end
1	739336	5.52655e+06	738771	5.52602e+06
2	743056	5.52458e+06	743487	5.5243e+06
3	746037	5.52625e+06	746395	5.52675e+06
4	747041	5.52564e+06	747945	5.52659e+06
5	747511	5.52657e+06	747354	5.52641e+06
6	748567	5.52832e+06	748614	5.52679e+06
7	746342	5.52935e+06	746343	5.52935e+06
8	746769	5.52887e+06	746770	5.52887e+06
9	745679	5.52844e+06	745680	5.52844e+06
10	746279	5.52661e+06	746280	5.52661e+06
11	746136	5.52639e+06	746138	5.52639e+06
12	745462	5.52632e+06	745463	5.52632e+06
13	745594	5.52579e+06	745595	5.52579e+06
14	746472	5.52587e+06	746472	5.52587e+06
15	742016	5.52897e+06	742017	5.52897e+06
16	741358	5.52731e+06	741359	5.52731e+06
17	742255	5.52706e+06	742256	5.52706e+06
18	742577	5.52692e+06	742578	5.52692e+06
19	742493	5.52658e+06	742494	5.52658e+06
20	742646	5.52587e+06	742647	5.52587e+06
21	742129	5.52537e+06	742130	5.52537e+06
22	743165	5.52514e+06	743165	5.52514e+06
23	744959	5.52517e+06	744960	5.52517e+06
24	744164	5.52409e+06	744164	5.52409e+06
25	744171	5.52308e+06	744172	5.52308e+06
26	742280	5.52484e+06	742280	5.52484e+06
27	741155	5.52362e+06	741156	5.52362e+06
28	746604	5.52463e+06	746604	5.52463e+06
29	742866	5.52496e+06	742867	5.52496e+06
30	745444	5.524e+06	745445	5.524e+06
31	745823	5.52518e+06	745823	5.52518e+06
32	744609	5.52593e+06	744609	5.52593e+06
33	748645	5.52903e+06	748646	5.52903e+06
34	748124	5.5264e+06	748125	5.5264e+06
35	741590	5.5273e+06	741591	5.5273e+06
36	741054	5.52379e+06	741055	5.52379e+06
37	742595	5.525e+06	742596	5.525e+06
38	742346	5.52494e+06	742346	5.52494e+06
39	745652	5.52978e+06	745653	5.52978e+06
40	746318	5.52253e+06	746319	5.52253e+06
41	747040	5.52792e+06	747041	5.52792e+06
42	745448	5.52772e+06	745449	5.52772e+06
43	743875	5.52809e+06	743876	5.52809e+06
44	743701	5.52635e+06	743702	5.52635e+06
45	742700	5.52527e+06	742701	5.52527e+06
46	746692	5.52422e+06	746693	5.52422e+06
47	746269	5.523e+06	746270	5.523e+06
48	741322	5.52445e+06	741323	5.52445e+06
49	739501	5.52705e+06	739502	5.52705e+06
50	737475	5.52663e+06	737476	5.52663e+06
51	739789	5.52743e+06	739791	5.52743e+06
52	742747	5.52621e+06	742748	5.52621e+06
53	742482	5.52622e+06	742483	5.52622e+06
54	740259	5.52411e+06	740359	5.52356e+06
55	740663	5.52413e+06	740946	5.52323e+06
57	748992	5.53324e+06	748993	5.53324e+06
58	749268	5.53328e+06	749268	5.53328e+06
59	750208	5.53301e+06	750209	5.53301e+06
60	752776	5.52434e+06	752777	5.52434e+06
61	749632	5.52789e+06	750007	5.52834e+06
62	749656	5.52779e+06	749657	5.52779e+06
63	749582	5.52776e+06	749583	5.52776e+06
64	750402	5.52843e+06	750403	5.52843e+06
65	750543	5.52901e+06	750544	5.52901e+06
66	749498	5.53036e+06	749499	5.53036e+06
67	749026	5.53016e+06	749027	5.53015e+06
68	749156	5.53054e+06	749158	5.53054e+06
69	751919	5.53073e+06	751921	5.53073e+06
70	750828	5.52771e+06	750829	5.52771e+06
71	751581	5.52832e+06	751582	5.52832e+06
72	752049	5.52872e+06	752050	5.52872e+06
73	752697	5.52952e+06	752698	5.52952e+06
74	752631	5.5289e+06	752632	5.5289e+06
75	753281	5.52909e+06	753282	5.52909e+06
76	753814	5.5292e+06	753815	5.5292e+06
77	754088	5.52975e+06	754089	5.52975e+06
78	751883	5.52911e+06	751884	5.52911e+06
79	753965	5.53e+06	753966	5.53e+06
80	752395	5.52864e+06	752396	5.52864e+06
81	751755	5.52946e+06	751757	5.52946e+06
